# Supplementary material
Source: PubMed Central journal article supplement (PMC6521716)
Supplement: NIHMS1008598-supplement-S.pdf [file NIHMS1008598-supplement-S.pdf]

## Supporting Information

# ***De Novo* Glycan Sequencing by Electronic Excitation Dissociation and Fixed-Charge Derivatization**

Yang Tang,<sup>1,2</sup> Yi Pu,<sup>1,2†</sup> Jinshan Gao,<sup>3</sup> Pengyu Hong,<sup>4</sup> Catherine E. Costello,<sup>1,2</sup> Cheng Lin\*<sup>2</sup>

1. Department of Chemistry, Boston University, Boston, MA 02215

2. Center for Biomedical Mass Spectrometry, Boston University School of Medicine, Boston, MA 02118

3. Department of Chemistry and Biochemistry, Montclair State University, Montclair, NJ 07043

4. Department of Computer Science, Brandeis University, Waltham, MA 02453

† Present address: Biogen, 125 Broadway, Cambridge, MA 02142

\* Corresponding author:

Cheng Lin

Center for Biomedical Mass Spectrometry

Boston University School of Medicine

670 Albany Street, Room 508

Boston, MA 02118

Tel: 617-638-6705

Fax: 617-638-6761

E-mail: [chenglin@bu.edu](mailto:chenglin@bu.edu)

## Table of Contents

|            |           |
|------------|-----------|
| Figure S-1 | Page S-3  |
| Figure S-2 | Page S-4  |
| Figure S-3 | Page S-5  |
| Figure S-4 | Page S-5  |
| Scheme S-1 | Page S-6  |
| Scheme S-2 | Page S-6  |
| Scheme S-3 | Page S-7  |
| Scheme S-4 | Page S-7  |
| Table S-1  | Page S-8  |
| Table S-2  | Page S-9  |
| Table S-3  | Page S-10 |
| Table S-4  | Page S-11 |
| Table S-5  | Page S-12 |
| Table S-6  | Page S-13 |
| Table S-7  | Page S-14 |
| Table S-8  | Page S-15 |
| Table S-9  | Page S-16 |
| Table S-10 | Page S-17 |
| Table S-11 | Page S-18 |
| Table S-12 | Page S-19 |
| Table S-13 | Page S-20 |

**Figure S-1.** Zoomed-in regions of the EED MS/MS spectra of Me-PRAGS-labeled (a) laminarihexaose, (b) maltohexaose, and (c) isomaltohexaose, illustrating the extent of hydrogen transfer products in reducing-end glycosidic fragments. Each panel shows a comparison of spectra obtained at three different electron energies: 12 eV, 16 eV, and 20 eV (from bottom to top). " indicates double hydrogen losses; ‡ indicates double hydrogen gains.

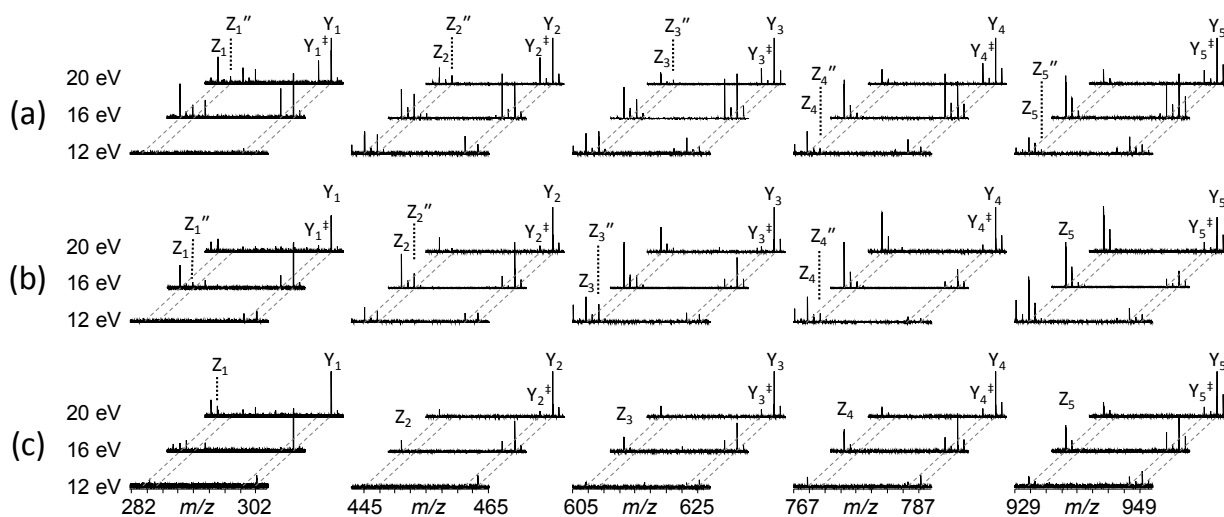

**Figure S-2.** EED (16 eV) MS/MS spectra of Me-PRAGS-labeled (a) LNFP I, (b) LNFP II, (c) LNFP III, (d) LNFP V, and (e) LNFP VI. Fragments formed by EED at 16 eV but not at 12 eV are highlighted.

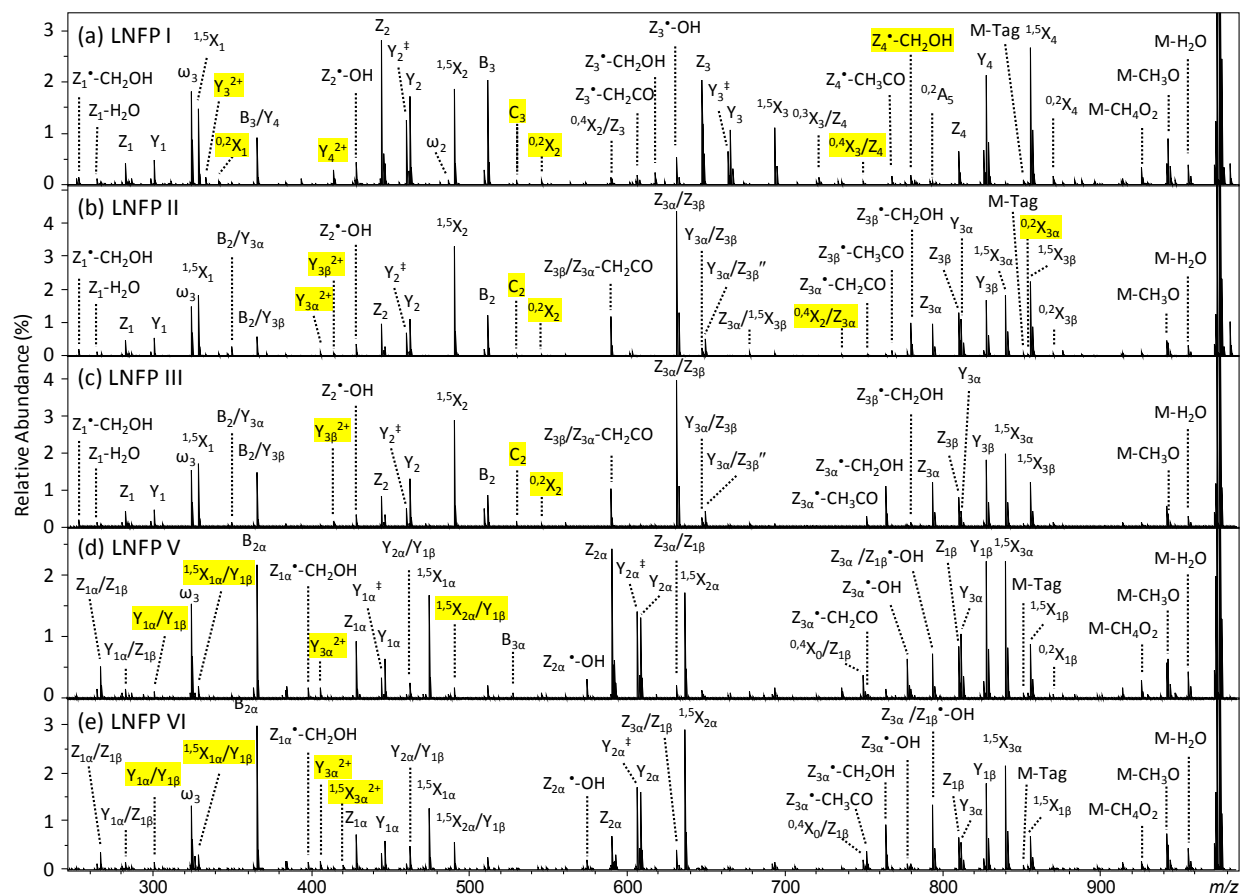

**Figure S-3.** Zoomed-in regions of the EED MS/MS spectra of Me-PRAGS-labeled (a) LNFP I (12 eV), (b) LNFP I (16 eV), and (c) LNFP V (16 eV), showing potential interference in topology analysis posed by secondary fragment ions.

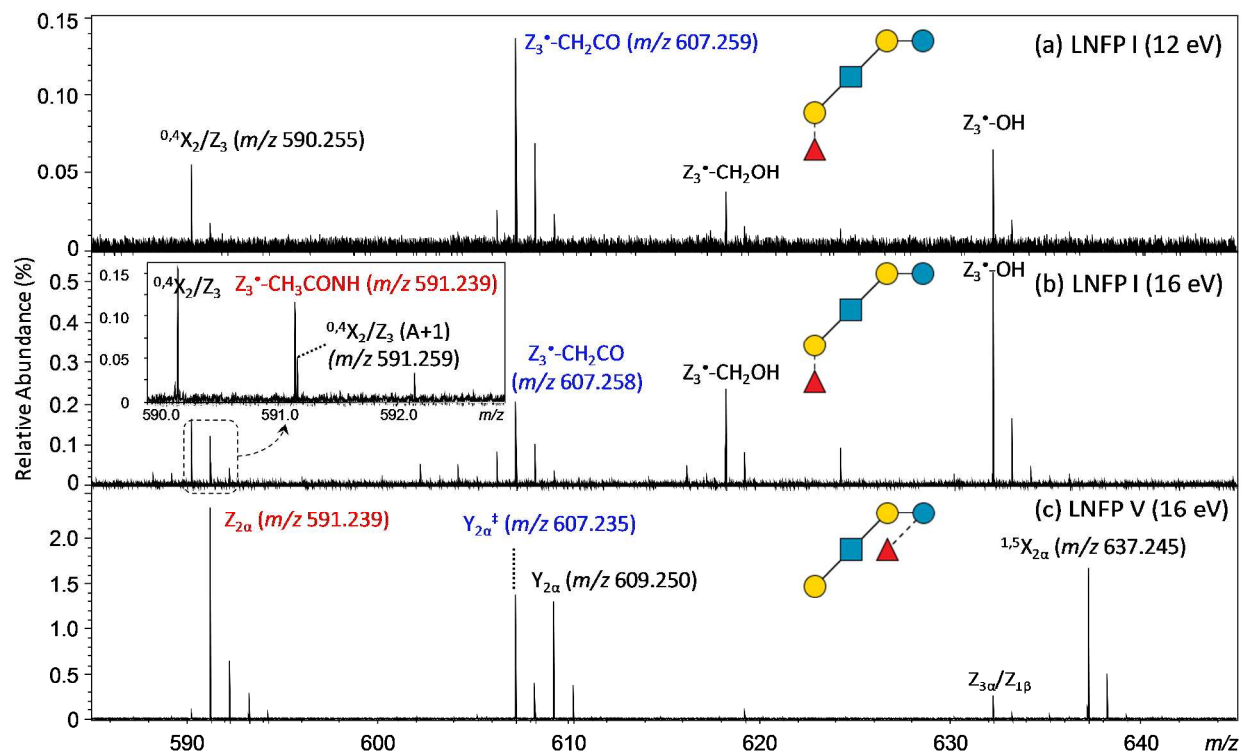

**Figure S-4.** Candidate topologies reconstructed by GlycoDeNovo based on the 16 eV EED spectra of Me-PRAGS-labeled linear hexaose glycans.

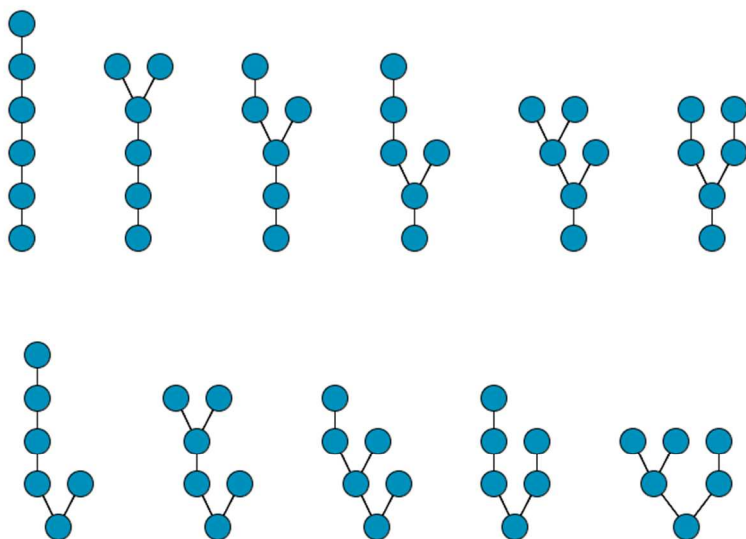

**Scheme S-1.** Chemical structure of the PRAGS reagent

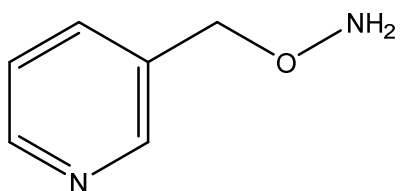

*O*-(pyridin-3-ylmethyl)hydroxylamine

**Scheme S-2.** Proposed mechanisms for formation of internal fragments: (a)  $Z_{3\alpha}/Z_{3\beta}$  of LNFP III via direct  $\beta$ -elimination, (b)  $Z_{3\alpha}/Z_{1\beta}$  of LNFP VI via radical migration, and (c)  $Z_{3\alpha}/Z_{1\beta}$  of LNFP VI via consecutive EED processes.

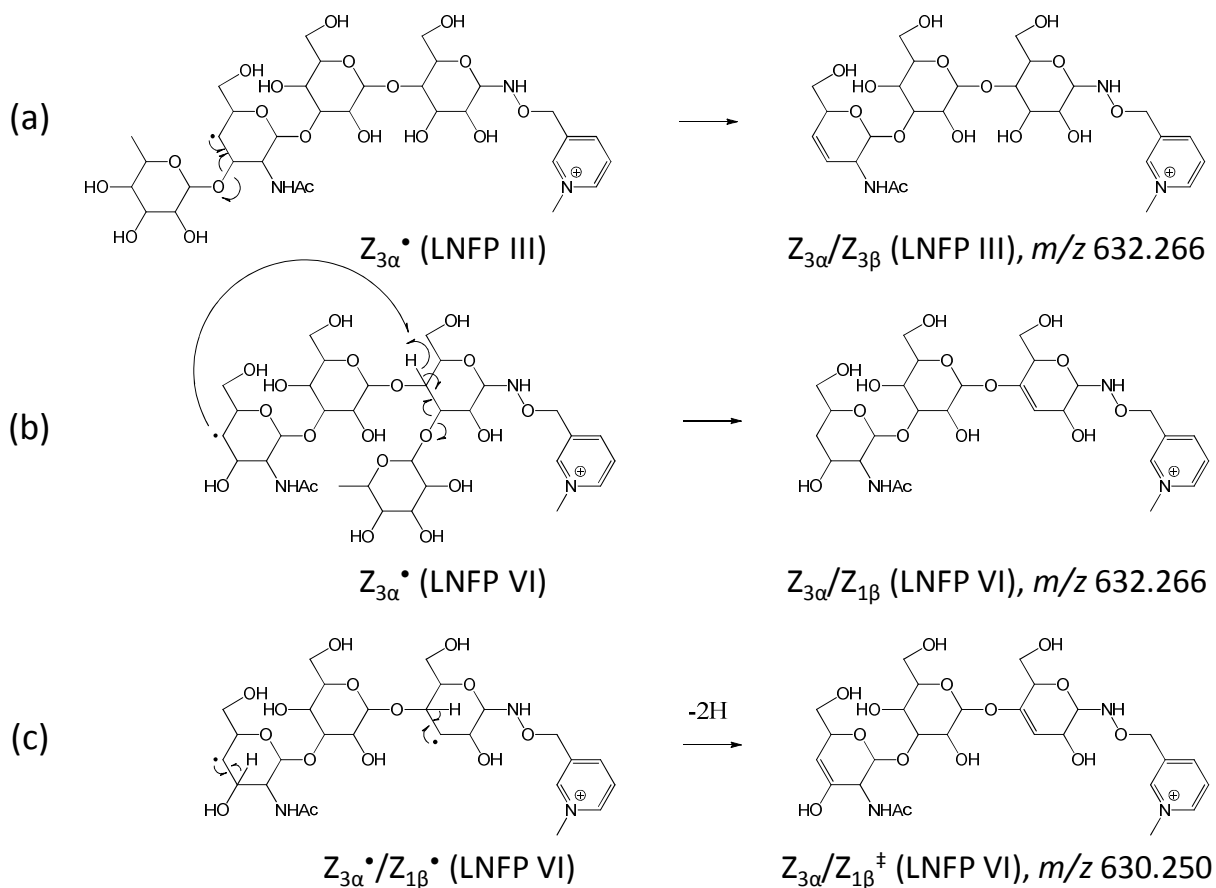

**Scheme S-3.** Proposed mechanisms for formation of linkage-specific secondary fragments at a GlcNAc residue: (a)  $Z_{3\beta}^{\bullet}$ -CH<sub>3</sub>CO (LNFP II), (b)  $Z_{3\alpha}^{\bullet}$ -CH<sub>3</sub>CO (LNFP II), and (c)  $Z_4^{\bullet}$ -CH<sub>3</sub>CO (LNFP I).

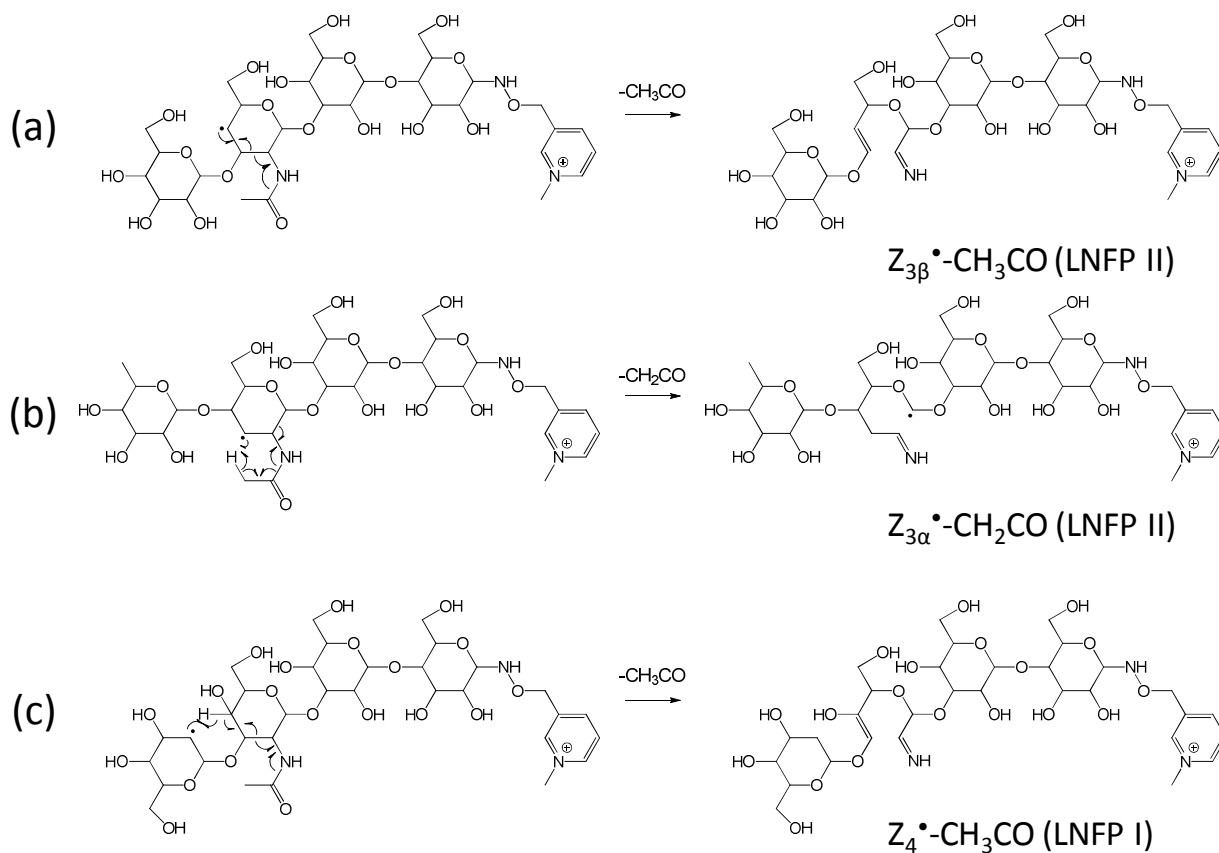

**Scheme S-4.** Proposed mechanism for formation of  $Z_3^{\bullet}$ -CH<sub>3</sub>CONH (LNFP I).

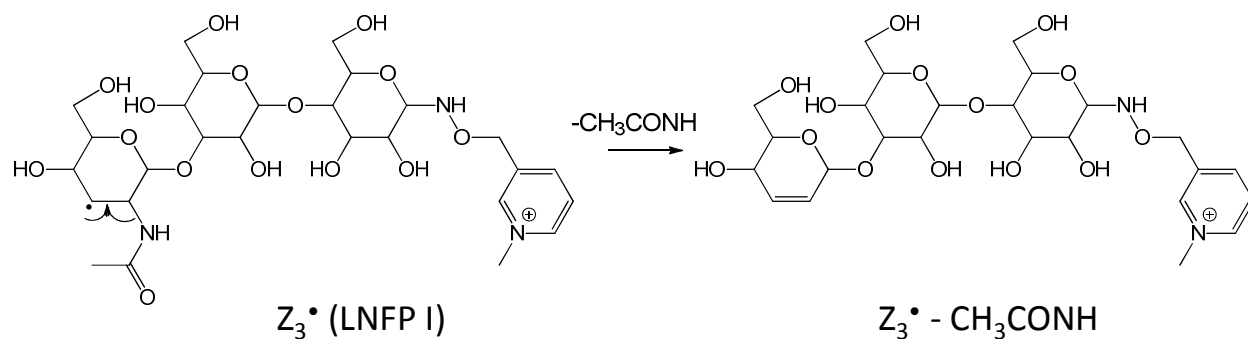

**Table S-1.** List of assigned EED (16 eV) fragments of the Me-PRAGS-labeled laminarihexaose.

| <i>m/z (obsv'd.)</i> | <i>z</i> | <i>Assignment</i>                               | <i>m/z (calc'd.)</i> | <i>Δm/z (ppm)</i> |
|----------------------|----------|-------------------------------------------------|----------------------|-------------------|
| 267.1334             | 1+       | Z <sub>1</sub> <sup>•</sup> -OH                 | 267.1334             | 0.00              |
| 283.1282             | 1+       | Z <sub>1</sub>                                  | 283.1288             | 2.12              |
| 299.1232             | 1+       | Y <sub>1</sub> <sup>†</sup>                     | 299.1233             | 0.33              |
| 301.1389             | 1+       | Y <sub>1</sub>                                  | 301.1389             | 0.00              |
| 325.1124             | 1+       | B <sub>2</sub>                                  | 325.1129             | 1.54              |
| 329.1338             | 1+       | <sup>1,5</sup> X <sub>1</sub>                   | 329.1338             | 0.00              |
| 370.4741             |          | ω <sub>3</sub>                                  |                      |                   |
| 415.1704             | 1+       | Z <sub>2</sub> <sup>•</sup> -CH <sub>2</sub> OH | 415.1706             | 0.48              |
| 429.1862             | 1+       | Z <sub>2</sub> <sup>•</sup> -OH                 | 429.1862             | 0.00              |
| 445.1811             | 1+       | Z <sub>2</sub>                                  | 445.1811             | 0.00              |
| 447.1968             | 1+       | Z <sub>2</sub> <sup>''</sup>                    | 447.1967             | -0.22             |
| 461.1761             | 1+       | Y <sub>2</sub> <sup>†</sup>                     | 461.1761             | 0.00              |
| 463.1916             | 1+       | Y <sub>2</sub>                                  | 463.1917             | 0.22              |
| 487.1651             | 1+       | B <sub>3</sub>                                  | 487.1657             | 1.23              |
| 491.1866             | 1+       | <sup>1,5</sup> X <sub>2</sub>                   | 491.1866             | 0.00              |
| 505.2022             | 1+       | <sup>0,2</sup> X <sub>2</sub>                   | 505.2023             | 0.20              |
| 577.2237             | 1+       | Z <sub>3</sub> <sup>•</sup> -CH <sub>2</sub> OH | 577.2234             | -0.52             |
| 591.2387             | 1+       | Z <sub>3</sub> <sup>•</sup> -OH                 | 591.239              | 0.51              |
| 607.2345             | 1+       | Z <sub>3</sub>                                  | 607.2339             | -0.99             |
| 609.2497             | 1+       | Z <sub>3</sub> <sup>''</sup>                    | 609.2495             | -0.33             |
| 623.2287             | 1+       | Y <sub>3</sub> <sup>†</sup>                     | 623.2289             | 0.32              |
| 625.2446             | 1+       | Y <sub>3</sub>                                  | 625.2445             | -0.16             |
| 649.2183             | 1+       | B <sub>4</sub>                                  | 649.2186             | 0.46              |
| 653.2394             | 1+       | <sup>1,5</sup> X <sub>3</sub>                   | 653.2394             | 0.00              |
| 667.2549             | 1+       | <sup>0,2</sup> X <sub>3</sub>                   | 667.2551             | 0.30              |
| 739.276              | 1+       | Z <sub>4</sub> <sup>•</sup> -CH <sub>2</sub> OH | 739.2763             | 0.41              |
| 753.2921             | 1+       | Z <sub>4</sub> <sup>•</sup> -OH                 | 753.2919             | -0.27             |
| 769.2866             | 1+       | Z <sub>4</sub>                                  | 769.2868             | 0.26              |
| 785.2825             | 1+       | Y <sub>4</sub> <sup>†</sup>                     | 785.2817             | -1.02             |
| 787.2972             | 1+       | Y <sub>4</sub>                                  | 787.2973             | 0.13              |
| 811.2704             | 1+       | B <sub>5</sub>                                  | 811.2714             | 1.23              |
| 815.2923             | 1+       | <sup>1,5</sup> X <sub>4</sub>                   | 815.2922             | -0.12             |
| 829.3077             | 1+       | <sup>0,2</sup> X <sub>4</sub>                   | 829.3079             | 0.24              |
| 901.33               | 1+       | Z <sub>5</sub> <sup>•</sup> -CH <sub>2</sub> OH | 901.3291             | -1.00             |
| 915.3447             | 1+       | Z <sub>5</sub> <sup>•</sup> -OH                 | 915.3447             | 0.00              |
| 931.3411             | 1+       | Z <sub>5</sub>                                  | 931.3396             | -1.61             |
| 947.3355             | 1+       | Y <sub>5</sub> <sup>†</sup>                     | 947.3346             | -0.95             |
| 949.3501             | 1+       | Y <sub>5</sub>                                  | 949.3502             | 0.11              |
| 977.3453             | 1+       | <sup>1,5</sup> X <sub>5</sub>                   | 977.3451             | -0.20             |
| 988.3352             | 1+       | M-Tag                                           | 988.3357             | 0.51              |
| 991.3607             | 1+       | <sup>0,2</sup> X <sub>5</sub>                   | 991.3607             | 0.00              |
| 1049.3672            | 1+       | M-C <sub>2</sub> H <sub>6</sub> O <sub>2</sub>  | 1049.3669            | -0.29             |
| 1063.3816            | 1+       | M-CH <sub>4</sub> O <sub>2</sub>                | 1063.3825            | 0.85              |
| 1080.3847            | 1+       | M-CH <sub>3</sub> O                             | 1080.3852            | 0.46              |
| 1093.3923            | 1+       | M-H <sub>2</sub> O                              | 1093.393             | 0.64              |
| 1111.4035            | 1+       | Precursor                                       | 1111.4035            | 0.00              |



**Table S-2.** List of assigned EED (16 eV) fragments of the Me-PRAGS-labeled maltohexaose.

| <i>m/z (obsv'd.)</i> | <i>z</i> | <i>Assignment</i>                               | <i>m/z (calc'd.)</i> | <i>Δm/z (ppm)</i> |
|----------------------|----------|-------------------------------------------------|----------------------|-------------------|
| 267.1332             | 1+       | Z <sub>1</sub> <sup>•</sup> -CH <sub>2</sub> OH | 267.1334             | 0.75              |
| 283.1283             | 1+       | Z <sub>1</sub>                                  | 283.1288             | 1.77              |
| 301.1388             | 1+       | Y <sub>1</sub>                                  | 301.1389             | 0.33              |
| 325.1124             | 1+       | B <sub>2</sub>                                  | 325.1129             | 1.54              |
| 329.1338             | 1+       | <sup>1,5</sup> X <sub>1</sub>                   | 329.1338             | 0.00              |
| 370.4749             |          | ω <sub>3</sub>                                  |                      |                   |
| 415.1706             | 1+       | Z <sub>2</sub> <sup>•</sup> -CH <sub>2</sub> OH | 415.1706             | 0.00              |
| 429.1861             | 1+       | Z <sub>2</sub> <sup>•</sup> -OH                 | 429.1862             | 0.23              |
| 445.1811             | 1+       | Z <sub>2</sub>                                  | 445.1811             | 0.00              |
| 463.1916             | 1+       | Y <sub>2</sub>                                  | 463.1917             | 0.22              |
| 487.1652             | 1+       | B <sub>3</sub>                                  | 487.1657             | 1.03              |
| 491.1865             | 1+       | <sup>1,5</sup> X <sub>2</sub>                   | 491.1866             | 0.20              |
| 505.2022             | 1+       | <sup>0,2</sup> X <sub>2</sub>                   | 505.2023             | 0.20              |
| 577.2235             | 1+       | Z <sub>3</sub> <sup>•</sup> -CH <sub>2</sub> OH | 577.2234             | -0.17             |
| 591.2391             | 1+       | Z <sub>3</sub> <sup>•</sup> -OH                 | 591.239              | -0.17             |
| 607.2345             | 1+       | Z <sub>3</sub>                                  | 607.2339             | -0.99             |
| 625.2444             | 1+       | Y <sub>3</sub>                                  | 625.2445             | 0.16              |
| 649.2181             | 1+       | B <sub>4</sub>                                  | 649.2186             | 0.77              |
| 653.2395             | 1+       | <sup>1,5</sup> X <sub>3</sub>                   | 653.2394             | -0.15             |
| 667.2552             | 1+       | <sup>0,2</sup> X <sub>3</sub>                   | 667.2551             | -0.15             |
| 739.2761             | 1+       | Z <sub>4</sub> <sup>•</sup> -CH <sub>2</sub> OH | 739.2763             | 0.27              |
| 753.2919             | 1+       | Z <sub>4</sub> <sup>•</sup> -OH                 | 753.2919             | 0.00              |
| 769.2865             | 1+       | Z <sub>4</sub>                                  | 769.2868             | 0.39              |
| 787.2973             | 1+       | Y <sub>4</sub>                                  | 787.2973             | 0.00              |
| 811.2704             | 1+       | B <sub>5</sub>                                  | 811.2714             | 1.23              |
| 815.2924             | 1+       | <sup>1,5</sup> X <sub>4</sub>                   | 815.2922             | -0.25             |
| 829.3078             | 1+       | <sup>0,2</sup> X <sub>4</sub>                   | 829.3079             | 0.12              |
| 901.3292             | 1+       | Z <sub>5</sub> <sup>•</sup> -CH <sub>2</sub> OH | 901.3291             | -0.11             |
| 915.3434             | 1+       | Z <sub>5</sub> <sup>•</sup> -OH                 | 915.3447             | 1.42              |
| 931.3396             | 1+       | Z <sub>5</sub>                                  | 931.3396             | 0.00              |
| 949.3502             | 1+       | Y <sub>5</sub>                                  | 949.3502             | 0.00              |
| 977.3452             | 1+       | <sup>1,5</sup> X <sub>5</sub>                   | 977.3451             | -0.10             |
| 988.3351             | 1+       | M-Tag                                           | 988.3357             | 0.61              |
| 991.3611             | 1+       | <sup>0,2</sup> X <sub>5</sub>                   | 991.3607             | -0.40             |
| 1051.382             | 1+       | M-C <sub>2</sub> H <sub>4</sub> O <sub>2</sub>  | 1051.3825            | 0.48              |
| 1063.3834            | 1+       | M-CH <sub>4</sub> O <sub>2</sub>                | 1063.3825            | -0.85             |
| 1080.3861            | 1+       | M-CH <sub>3</sub> O                             | 1080.3852            | -0.83             |
| 1093.3929            | 1+       | M-H <sub>2</sub> O                              | 1093.393             | 0.09              |
| 1111.403             | 1+       | Precursor                                       | 1111.4035            | 0.45              |

**Table S-3.** List of assigned EED (16 eV) fragments of the Me-PRAGS-labeled isomaltohexaose.

| <i>m/z (obsv'd.)</i> | <i>z</i> | <i>Assignment</i>             | <i>m/z (calc'd.)</i> | <i>Δm/z (ppm)</i> |
|----------------------|----------|-------------------------------|----------------------|-------------------|
| 283.1284             | 1+       | Z <sub>1</sub>                | 283.1288             | 1.41              |
| 301.1388             | 1+       | Y <sub>1</sub>                | 301.1389             | 0.33              |
| 325.1125             | 1+       | B <sub>2</sub>                | 325.1129             | 1.23              |
| 329.1339             | 1+       | <sup>1,5</sup> X <sub>1</sub> | 329.1338             | -0.30             |
| 343.1492             | 1+       | <sup>0,2</sup> X <sub>1</sub> | 343.1494             | 0.58              |
| 370.4744             |          | ω <sub>3</sub>                |                      |                   |
| 403.1706             | 1+       | <sup>0,4</sup> X <sub>1</sub> | 403.1706             | 0.00              |
| 445.1811             | 1+       | Z <sub>2</sub>                | 445.1811             | 0.00              |
| 463.1917             | 1+       | Y <sub>2</sub>                | 463.1917             | 0.00              |
| 487.1661             | 1+       | B <sub>3</sub>                | 487.1657             | -0.82             |
| 491.1865             | 1+       | <sup>1,5</sup> X <sub>2</sub> | 491.1866             | 0.20              |
| 505.2024             | 1+       | <sup>0,2</sup> X <sub>2</sub> | 505.2023             | -0.20             |
| 565.2229             | 1+       | <sup>0,4</sup> X <sub>2</sub> | 565.2234             | 0.88              |
| 607.2344             | 1+       | Z <sub>3</sub>                | 607.2339             | -0.82             |
| 625.2443             | 1+       | Y <sub>3</sub>                | 625.2445             | 0.32              |
| 649.2176             | 1+       | B <sub>4</sub>                | 649.2186             | 1.54              |
| 653.2394             | 1+       | <sup>1,5</sup> X <sub>3</sub> | 653.2394             | 0.00              |
| 667.2551             | 1+       | <sup>0,2</sup> X <sub>3</sub> | 667.2551             | 0.00              |
| 727.2768             | 1+       | <sup>0,4</sup> X <sub>3</sub> | 727.2762             | -0.82             |
| 769.2865             | 1+       | Z <sub>4</sub>                | 769.2868             | 0.39              |
| 787.2972             | 1+       | Y <sub>4</sub>                | 787.2973             | 0.13              |
| 815.2924             | 1+       | <sup>1,5</sup> X <sub>4</sub> | 815.2922             | -0.25             |
| 829.3079             | 1+       | <sup>0,2</sup> X <sub>4</sub> | 829.3079             | 0.00              |
| 889.3299             | 1+       | <sup>0,4</sup> X <sub>4</sub> | 889.329              | -1.01             |
| 931.3397             | 1+       | Z <sub>5</sub>                | 931.3396             | -0.11             |
| 949.3502             | 1+       | Y <sub>5</sub>                | 949.3502             | 0.00              |
| 977.3452             | 1+       | <sup>1,5</sup> X <sub>5</sub> | 977.3451             | -0.10             |
| 988.3353             | 1+       | M-Tag                         | 988.3357             | 0.40              |
| 991.3611             | 1+       | <sup>0,2</sup> X <sub>5</sub> | 991.3607             | -0.40             |
| 1051.3819            | 1+       | <sup>0,4</sup> X <sub>5</sub> | 1051.3819            | 0.00              |
| 1081.3931            | 1+       | M-CH <sub>2</sub> O           | 1081.393             | -0.09             |
| 1093.3933            | 1+       | M-H <sub>2</sub> O            | 1093.393             | -0.27             |
| 1111.4034            | 1+       | Precursor                     | 1111.4035            | 0.09              |

**Table S-4.** List of assigned EED (12 eV) fragments of the Me-PRAGS-labeled LNFP I.

| <i>m/z (obsv'd.)</i> | <i>z</i> | <i>Assignment</i>                               | <i>m/z (calc'd.)</i> | <i>Δm/z (ppm)</i> |
|----------------------|----------|-------------------------------------------------|----------------------|-------------------|
| 253.1177             | 1+       | Z <sub>1</sub> <sup>•</sup> -CH <sub>2</sub> OH | 253.1183             | 2.37              |
| 283.1283             | 1+       | Z <sub>1</sub>                                  | 283.1288             | 1.77              |
| 301.1389             | 1+       | Y <sub>1</sub>                                  | 301.1394             | 1.66              |
| 324.7988             |          | ω <sub>3</sub>                                  |                      |                   |
| 329.1338             | 1+       | <sup>1,5</sup> X <sub>1</sub>                   | 329.1343             | 1.52              |
| 366.1389             | 1+       | B <sub>3</sub> /Y <sub>4</sub>                  | 366.1395             | 1.64              |
| 429.1862             | 1+       | Z <sub>2</sub> <sup>•</sup> -OH                 | 429.1862             | 0.00              |
| 445.1811             | 1+       | Z <sub>2</sub>                                  | 445.1816             | 1.12              |
| 447.1968             | 1+       | Z <sub>2</sub> <sup>''</sup>                    | 447.1972             | 0.89              |
| 461.176              | 1+       | Y <sub>2</sub> <sup>†</sup>                     | 461.1766             | 1.30              |
| 463.1916             | 1+       | Y <sub>2</sub>                                  | 463.1922             | 1.30              |
| 487.191              |          | ω <sub>2</sub>                                  |                      |                   |
| 491.1866             | 1+       | <sup>1,5</sup> X <sub>2</sub>                   | 491.1871             | 1.02              |
| 512.1969             | 1+       | B <sub>3</sub>                                  | 512.1974             | 0.98              |
| 590.2549             | 1+       | <sup>0,4</sup> X <sub>2</sub> /Z <sub>3</sub>   | 590.2556             | 1.19              |
| 607.2592             | 1+       | Z <sub>3</sub> <sup>•</sup> -CH <sub>2</sub> CO | 607.2583             | -1.48             |
| 618.2503             | 1+       | Z <sub>3</sub> <sup>•</sup> -CH <sub>2</sub> OH | 618.2505             | 0.32              |
| 632.2656             | 1+       | Z <sub>3</sub> <sup>•</sup> -OH                 | 632.2661             | 0.79              |
| 648.2612             | 1+       | Z <sub>3</sub>                                  | 648.261              | -0.31             |
| 664.2555             | 1+       | Y <sub>3</sub> <sup>†</sup>                     | 664.256              | 0.75              |
| 666.2711             | 1+       | Y <sub>3</sub>                                  | 666.2716             | 0.75              |
| 694.2661             | 1+       | <sup>1,5</sup> X <sub>3</sub>                   | 694.2665             | 0.58              |
| 768.3027             | 1+       | Z <sub>4</sub> <sup>•</sup> -CH <sub>3</sub> CO | 768.3033             | 0.78              |
| 794.2922             | 1+       | <sup>0,2</sup> A <sub>5</sub>                   | 794.2925             | 0.38              |
| 810.3143             | 1+       | Z <sub>4</sub>                                  | 810.3138             | -0.62             |
| 826.3083             | 1+       | Y <sub>4</sub> <sup>†</sup>                     | 826.3088             | 0.61              |
| 828.324              | 1+       | Y <sub>4</sub>                                  | 828.3244             | 0.48              |
| 851.3135             | 1+       | M-Tag                                           | 851.3145             | 1.17              |
| 856.319              | 1+       | <sup>1,5</sup> X <sub>4</sub>                   | 856.3193             | 0.35              |
| 870.3349             | 1+       | <sup>0,2</sup> X <sub>4</sub>                   | 870.3349             | 0.00              |
| 926.3612             | 1+       | M-CH <sub>4</sub> O <sub>2</sub>                | 926.3613             | 0.11              |
| 943.3635             | 1+       | M-CH <sub>3</sub> O                             | 943.364              | 0.53              |
| 956.3721             | 1+       | M-H <sub>2</sub> O                              | 956.3718             | -0.31             |
| 974.3819             | 1+       | Precursor                                       | 974.3823             | 0.41              |

**Table S-5.** List of assigned EED (12 eV) fragments of the Me-PRAGS-labeled LNFP II.

| <i>m/z (obsv'd.)</i> | <i>z</i> | <i>Assignment</i>                                    | <i>m/z (calc'd.)</i> | <i>Δm/z (ppm)</i> |
|----------------------|----------|------------------------------------------------------|----------------------|-------------------|
| 253.1178             | 1+       | Z <sub>1</sub> <sup>•</sup> -CH <sub>2</sub> OH      | 253.1183             | 1.98              |
| 283.1284             | 1+       | Z <sub>1</sub>                                       | 283.1288             | 1.41              |
| 301.1389             | 1+       | Y <sub>1</sub>                                       | 301.1394             | 1.66              |
| 324.7988             |          | ω <sub>3</sub>                                       |                      |                   |
| 329.1338             | 1+       | <sup>1,5</sup> X <sub>1</sub>                        | 329.1343             | 1.52              |
| 350.144              | 1+       | B <sub>2</sub> /Y <sub>3α</sub>                      | 350.1446             | 1.71              |
| 366.1389             | 1+       | B <sub>2</sub> /Y <sub>3β</sub>                      | 366.1395             | 1.64              |
| 429.1863             | 1+       | Z <sub>2</sub> <sup>•</sup> -OH                      | 429.1862             | -0.23             |
| 445.1812             | 1+       | Z <sub>2</sub>                                       | 445.1816             | 0.90              |
| 447.1968             | 1+       | Z <sub>2</sub> ''                                    | 447.1972             | 0.89              |
| 461.1761             | 1+       | Y <sub>2</sub> <sup>‡</sup>                          | 461.1766             | 1.08              |
| 463.1917             | 1+       | Y <sub>2</sub>                                       | 463.1922             | 1.08              |
| 487.1901             |          | ω <sub>2</sub>                                       |                      |                   |
| 491.1866             | 1+       | <sup>1,5</sup> X <sub>2</sub>                        | 491.1871             | 1.02              |
| 512.1968             | 1+       | B <sub>2</sub>                                       | 512.1974             | 1.17              |
| 590.2548             | 1+       | Z <sub>3α</sub> /Z <sub>3β</sub> -CH <sub>2</sub> CO | 590.2556             | 1.36              |
| 632.2659             | 1+       | Z <sub>3α</sub> /Z <sub>3β</sub>                     | 632.2661             | 0.32              |
| 648.2609             | 1+       | Y <sub>3α</sub> /Z <sub>3β</sub>                     | 648.261              | 0.15              |
| 650.2761             | 1+       | Y <sub>3α</sub> /Z <sub>3β</sub> ''                  | 650.2766             | 0.77              |
| 678.2712             | 1+       | Z <sub>3α</sub> / <sup>1,5</sup> X <sub>3β</sub>     | 678.2716             | 0.59              |
| 753.3166             | 1+       | Z <sub>3α</sub> <sup>•</sup> -CH <sub>2</sub> CO     | 753.3162             | -0.53             |
| 768.3026             | 1+       | Z <sub>3β</sub> <sup>•</sup> -CH <sub>3</sub> CO     | 768.3033             | 0.91              |
| 780.3026             | 1+       | Z <sub>3β</sub> <sup>•</sup> -CH <sub>2</sub> OH     | 780.3033             | 0.90              |
| 794.3186             | 1+       | Z <sub>3α</sub>                                      | 794.3189             | 0.38              |
| 810.3144             | 1+       | Z <sub>3β</sub>                                      | 810.3138             | -0.74             |
| 812.3296             | 1+       | Y <sub>3α</sub>                                      | 812.3295             | -0.12             |
| 828.324              | 1+       | Y <sub>3β</sub>                                      | 828.3244             | 0.48              |
| 840.3241             | 1+       | <sup>1,5</sup> X <sub>3α</sub>                       | 840.3244             | 0.36              |
| 851.3134             | 1+       | M-Tag                                                | 851.3145             | 1.29              |
| 856.3189             | 1+       | <sup>1,5</sup> X <sub>3β</sub>                       | 856.3193             | 0.47              |
| 870.3347             | 1+       | <sup>0,2</sup> X <sub>3β</sub>                       | 870.3349             | 0.23              |
| 943.3637             | 1+       | M-CH <sub>3</sub> O                                  | 943.364              | 0.32              |
| 956.3711             | 1+       | M-H <sub>2</sub> O                                   | 956.3718             | 0.73              |
| 974.3817             | 1+       | Precursor                                            | 974.3823             | 0.62              |

**Table S-6.** List of assigned EED (12 eV) fragments of the Me-PRAGS-labeled LNFP III.

| <i>m/z (obsv'd.)</i> | <i>z</i> | <i>Assignment</i>                                    | <i>m/z (calc'd.)</i> | <i>Δm/z (ppm)</i> |
|----------------------|----------|------------------------------------------------------|----------------------|-------------------|
| 253.1178             | 1+       | Z <sub>1</sub> <sup>•</sup> -CH <sub>2</sub> OH      | 253.1183             | 1.98              |
| 283.1284             | 1+       | Z <sub>1</sub>                                       | 283.1288             | 1.41              |
| 301.1388             | 1+       | Y <sub>1</sub>                                       | 301.1394             | 1.99              |
| 324.7988             |          | ω <sub>3</sub>                                       |                      |                   |
| 329.1338             | 1+       | <sup>1,5</sup> X <sub>1</sub>                        | 329.1343             | 1.52              |
| 350.144              | 1+       | B <sub>2</sub> /Y <sub>3α</sub>                      | 350.1446             | 1.71              |
| 366.139              | 1+       | B <sub>2</sub> /Y <sub>3β</sub>                      | 366.1395             | 1.37              |
| 429.1862             | 1+       | Z <sub>2</sub> <sup>•</sup> -OH                      | 429.1862             | 0.00              |
| 445.1811             | 1+       | Z <sub>2</sub>                                       | 445.1816             | 1.12              |
| 447.1968             | 1+       | Z <sub>2</sub> ''                                    | 447.1972             | 0.89              |
| 461.1758             | 1+       | Y <sub>2</sub> <sup>‡</sup>                          | 461.1766             | 1.73              |
| 463.1917             | 1+       | Y <sub>2</sub>                                       | 463.1922             | 1.08              |
| 487.1908             |          | ω <sub>2</sub>                                       |                      |                   |
| 491.1866             | 1+       | <sup>1,5</sup> X <sub>2</sub>                        | 491.1871             | 1.02              |
| 512.1968             | 1+       | B <sub>2</sub>                                       | 512.1974             | 1.17              |
| 590.2563             | 1+       | Z <sub>3α</sub> /Z <sub>3β</sub> -CH <sub>2</sub> CO | 590.2556             | -1.19             |
| 632.2658             | 1+       | Z <sub>3α</sub> /Z <sub>3β</sub>                     | 632.2661             | 0.47              |
| 648.2605             | 1+       | Y <sub>3α</sub> /Z <sub>3β</sub>                     | 648.261              | 0.77              |
| 650.2761             | 1+       | Y <sub>3α</sub> /Z <sub>3β</sub> ''                  | 650.2766             | 0.77              |
| 752.3079             | 1+       | Z <sub>3α</sub> <sup>•</sup> -CH <sub>3</sub> CO     | 752.3084             | 0.66              |
| 764.3079             | 1+       | Z <sub>3α</sub> <sup>•</sup> -CH <sub>2</sub> OH     | 764.3084             | 0.65              |
| 780.3031             | 1+       | Z <sub>3β</sub> <sup>•</sup> -CH <sub>2</sub> OH     | 780.3033             | 0.26              |
| 794.318              | 1+       | Z <sub>3α</sub>                                      | 794.3189             | 1.13              |
| 810.3143             | 1+       | Z <sub>3β</sub>                                      | 810.3138             | -0.62             |
| 812.3289             | 1+       | Y <sub>3α</sub>                                      | 812.3295             | 0.74              |
| 828.3242             | 1+       | Y <sub>3β</sub>                                      | 828.3244             | 0.24              |
| 840.3243             | 1+       | <sup>1,5</sup> X <sub>3α</sub>                       | 840.3244             | 0.12              |
| 851.3137             | 1+       | M-Tag                                                | 851.3145             | 0.94              |
| 856.3183             | 1+       | <sup>1,5</sup> X <sub>3β</sub>                       | 856.3193             | 1.17              |
| 943.3631             | 1+       | M-CH <sub>3</sub> O                                  | 943.364              | 0.95              |
| 956.3717             | 1+       | M-H <sub>2</sub> O                                   | 956.3718             | 0.10              |
| 974.382              | 1+       | Precursor                                            | 974.3823             | 0.31              |

**Table S-7.** List of assigned EED (12 eV) fragments of the Me-PRAGS-labeled LNFP V.

| <i>m/z (obsv'd.)</i> | <i>z</i> | <i>Assignment</i>                                  | <i>m/z (calc'd.)</i> | <i>Δm/z (ppm)</i> |
|----------------------|----------|----------------------------------------------------|----------------------|-------------------|
| 267.134              | 1+       | Z <sub>1α</sub> /Z <sub>1β</sub>                   | 267.1339             | -0.37             |
| 283.1291             | 1+       | Y <sub>1α</sub> /Z <sub>1β</sub>                   | 283.1288             | -1.06             |
| 324.7995             |          | ω <sub>3</sub>                                     |                      |                   |
| 366.1395             | 1+       | B <sub>2α</sub>                                    | 366.1395             | 0.00              |
| 399.1759             | 1+       | Z <sub>1α</sub> <sup>•</sup> -CH <sub>2</sub> OH   | 399.1762             | 0.75              |
| 429.1867             | 1+       | Z <sub>1α</sub>                                    | 429.1867             | 0.00              |
| 445.1815             | 1+       | Y <sub>1α</sub> <sup>‡</sup>                       | 445.1817             | 0.45              |
| 447.1973             | 1+       | Y <sub>1α</sub>                                    | 447.1973             | 0.00              |
| 463.1924             | 1+       | Y <sub>2α</sub> /Y <sub>1β</sub>                   | 463.1922             | -0.43             |
| 475.1922             | 1+       | <sup>1,5</sup> X <sub>1α</sub>                     | 475.1922             | 0.00              |
| 487.1911             |          | ω <sub>2</sub>                                     |                      |                   |
| 528.1922             | 1+       | B <sub>3α</sub>                                    | 528.1923             | 0.19              |
| 546.2027             | 1+       | C <sub>3α</sub>                                    | 546.2029             | 0.37              |
| 575.2444             | 1+       | Z <sub>2α</sub> <sup>•</sup> -OH                   | 575.2446             | 0.35              |
| 591.2399             | 1+       | Z <sub>2α</sub>                                    | 591.2395             | -0.68             |
| 593.2551             | 1+       | Z <sub>2α</sub> <sup>''</sup>                      | 593.2555             | 0.67              |
| 607.2349             | 1+       | Y <sub>2α</sub> <sup>‡</sup>                       | 607.2345             | -0.66             |
| 609.2501             | 1+       | Y <sub>2α</sub>                                    | 609.2501             | 0.00              |
| 632.2659             | 1+       | Z <sub>3α</sub> /Z <sub>1β</sub>                   | 632.2661             | 0.32              |
| 637.2451             | 1+       | <sup>1,5</sup> X <sub>2α</sub>                     | 637.245              | -0.16             |
| 750.2933             | 1+       | <sup>0,4</sup> X <sub>0</sub> /Z <sub>1β</sub>     | 750.2927             | -0.80             |
| 753.3164             | 1+       | Z <sub>3α</sub> <sup>•</sup> -CH <sub>2</sub> CO   | 753.3162             | -0.27             |
| 778.3241             | 1+       | Z <sub>3α</sub> <sup>•</sup> -OH                   | 778.3235             | -0.77             |
| 794.3184             | 1+       | Z <sub>3α</sub> (Z <sub>1β</sub> <sup>•</sup> -OH) | 794.3189             | 0.63              |
| 810.3149             | 1+       | Z <sub>1β</sub>                                    | 810.3138             | -1.36             |
| 812.329              | 1+       | Y <sub>3α</sub>                                    | 812.3295             | 0.62              |
| 828.3245             | 1+       | Y <sub>1β</sub>                                    | 828.3244             | -0.12             |
| 840.3246             | 1+       | <sup>1,5</sup> X <sub>3α</sub>                     | 840.3244             | -0.24             |
| 851.3137             | 1+       | M-Tag                                              | 851.3145             | 0.94              |
| 856.3195             | 1+       | <sup>1,5</sup> X <sub>1β</sub>                     | 856.3193             | -0.23             |
| 926.3613             | 1+       | M-CH <sub>4</sub> O <sub>2</sub>                   | 926.3613             | 0.00              |
| 943.3645             | 1+       | M-CH <sub>3</sub> O                                | 943.364              | -0.53             |
| 956.3716             | 1+       | M-H <sub>2</sub> O                                 | 956.3718             | 0.21              |
| 974.3821             | 1+       | Precursor                                          | 974.3823             | 0.21              |

**Table S-8.** List of assigned EED (12 eV) fragments of the Me-PRAGS-labeled LNFP VI.

| <i>m/z (obsv'd.)</i> | <i>z</i> | <i>Assignment</i>                                  | <i>m/z (calc'd.)</i> | <i>Δm/z (ppm)</i> |
|----------------------|----------|----------------------------------------------------|----------------------|-------------------|
| 267.1339             | 1+       | Z <sub>1α</sub> /Z <sub>1β</sub>                   | 267.1339             | 0.00              |
| 283.1288             | 1+       | Y <sub>1α</sub> /Z <sub>1β</sub>                   | 283.1288             | 0.00              |
| 324.7993             |          | ω <sub>3</sub>                                     |                      |                   |
| 366.1394             | 1+       | B <sub>2α</sub>                                    | 366.1395             | 0.27              |
| 399.176              | 1+       | Z <sub>1α</sub> <sup>•</sup> -CH <sub>2</sub> OH   | 399.1762             | 0.50              |
| 429.1867             | 1+       | Z <sub>1α</sub>                                    | 429.1867             | 0.00              |
| 445.1817             | 1+       | Y <sub>1α</sub> <sup>‡</sup>                       | 445.1817             | 0.00              |
| 447.1973             | 1+       | Y <sub>1α</sub>                                    | 447.1973             | 0.00              |
| 463.1922             | 1+       | Y <sub>2α</sub> /Y <sub>1β</sub>                   | 463.1922             | 0.00              |
| 475.1922             | 1+       | <sup>1,5</sup> X <sub>1α</sub>                     | 475.1922             | 0.00              |
| 487.1909             |          | ω <sub>2</sub>                                     |                      |                   |
| 491.1871             | 1+       | <sup>1,5</sup> X <sub>2α</sub> /Y <sub>1β</sub>    | 491.1871             | 0.00              |
| 575.2443             | 1+       | Z <sub>2α</sub> <sup>•</sup> -OH                   | 575.2446             | 0.52              |
| 591.2391             | 1+       | Z <sub>2α</sub>                                    | 591.2395             | 0.68              |
| 593.2552             | 1+       | Z <sub>2α</sub> <sup>''</sup>                      | 593.2555             | 0.51              |
| 607.2345             | 1+       | Y <sub>2α</sub> <sup>‡</sup>                       | 607.2345             | 0.00              |
| 609.2501             | 1+       | Y <sub>2α</sub>                                    | 609.2501             | 0.00              |
| 632.2659             | 1+       | Z <sub>3α</sub> /Z <sub>1β</sub>                   | 632.2661             | 0.32              |
| 637.2449             | 1+       | <sup>1,5</sup> X <sub>2α</sub>                     | 637.245              | 0.16              |
| 750.2929             | 1+       | <sup>0,4</sup> X <sub>0</sub> /Z <sub>1β</sub>     | 750.2927             | -0.27             |
| 752.3079             | 1+       | Z <sub>3α</sub> <sup>•</sup> -CH <sub>3</sub> CO   | 752.3084             | 0.66              |
| 764.3085             | 1+       | Z <sub>3α</sub> <sup>•</sup> -CH <sub>2</sub> OH   | 764.3084             | -0.13             |
| 778.3239             | 1+       | Z <sub>3α</sub> <sup>•</sup> -OH                   | 778.3235             | -0.51             |
| 794.3189             | 1+       | Z <sub>3α</sub> (Z <sub>1β</sub> <sup>•</sup> -OH) | 794.3189             | 0.00              |
| 810.314              | 1+       | Z <sub>1β</sub>                                    | 810.3138             | -0.25             |
| 812.3305             | 1+       | Y <sub>3α</sub>                                    | 812.3295             | -1.23             |
| 828.3245             | 1+       | Y <sub>1β</sub>                                    | 828.3244             | -0.12             |
| 840.3245             | 1+       | <sup>1,5</sup> X <sub>3α</sub>                     | 840.3244             | -0.12             |
| 851.3141             | 1+       | M-Tag                                              | 851.3145             | 0.47              |
| 856.3194             | 1+       | <sup>1,5</sup> X <sub>1β</sub>                     | 856.3193             | -0.12             |
| 926.3611             | 1+       | M-CH <sub>4</sub> O <sub>2</sub>                   | 926.3613             | 0.22              |
| 943.3649             | 1+       | M-CH <sub>3</sub> O                                | 943.364              | -0.95             |
| 956.3717             | 1+       | M-H <sub>2</sub> O                                 | 956.3718             | 0.10              |
| 974.382              | 1+       | Precursor                                          | 974.3823             | 0.31              |

**Table S-9.** List of assigned EED (16 eV) fragments of the Me-PRAGS-labeled LNFP I.

| <i>m/z (obsv'd.)</i> | <i>z</i> | <i>Assignment</i>                               | <i>m/z (calc'd.)</i> | <i>Δm/z (ppm)</i> |
|----------------------|----------|-------------------------------------------------|----------------------|-------------------|
| 253.1176             | 1+       | Z <sub>1</sub> <sup>•</sup> -CH <sub>2</sub> OH | 253.1183             | 2.77              |
| 265.1177             | 1+       | Z <sub>1</sub> <sup>•</sup> -H <sub>2</sub> O   | 265.1183             | 2.26              |
| 283.1283             | 1+       | Z <sub>1</sub>                                  | 283.1288             | 1.77              |
| 301.1389             | 1+       | Y <sub>1</sub>                                  | 301.1394             | 1.66              |
| 324.7991             |          | ω <sub>3</sub>                                  |                      |                   |
| 329.1338             | 1+       | <sup>1,5</sup> X <sub>1</sub>                   | 329.1343             | 1.52              |
| 333.6388             | 2+       | Y <sub>3</sub> <sup>2+</sup>                    | 333.6397             | 2.70              |
| 343.1494             | 1+       | <sup>0,2</sup> X <sub>1</sub>                   | 343.1499             | 1.46              |
| 366.1389             | 1+       | B <sub>3</sub> /Y <sub>4</sub>                  | 366.1395             | 1.64              |
| 414.6655             | 2+       | Y <sub>4</sub> <sup>2+</sup>                    | 414.6661             | 1.45              |
| 429.1863             | 1+       | Z <sub>2</sub> <sup>•</sup> -OH                 | 429.1862             | -0.23             |
| 445.1811             | 1+       | Z <sub>2</sub>                                  | 445.1816             | 1.12              |
| 461.1761             | 1+       | Y <sub>2</sub> <sup>‡</sup>                     | 461.1766             | 1.08              |
| 463.1917             | 1+       | Y <sub>2</sub>                                  | 463.1922             | 1.08              |
| 487.1917             |          | ω <sub>2</sub>                                  |                      |                   |
| 491.1866             | 1+       | <sup>1,5</sup> X <sub>2</sub>                   | 491.1871             | 1.02              |
| 512.1968             | 1+       | B <sub>3</sub>                                  | 512.1974             | 1.17              |
| 530.2073             | 1+       | C <sub>3</sub>                                  | 530.2079             | 1.13              |
| 546.229              | 1+       | <sup>0,2</sup> X <sub>2</sub>                   | 546.2293             | 0.55              |
| 590.2551             | 1+       | <sup>0,4</sup> X <sub>2</sub> /Z <sub>3</sub>   | 590.2556             | 0.85              |
| 607.2583             | 1+       | Z <sub>3</sub> <sup>•</sup> -CH <sub>2</sub> CO | 607.2583             | 0.00              |
| 618.2498             | 1+       | Z <sub>3</sub> <sup>•</sup> -CH <sub>2</sub> OH | 618.2505             | 1.13              |
| 632.2654             | 1+       | Z <sub>3</sub> <sup>•</sup> -OH                 | 632.2661             | 1.11              |
| 648.2605             | 1+       | Z <sub>3</sub>                                  | 648.261              | 0.77              |
| 664.2558             | 1+       | Y <sub>3</sub> <sup>‡</sup>                     | 664.256              | 0.30              |
| 666.2711             | 1+       | Y <sub>3</sub>                                  | 666.2716             | 0.75              |
| 694.2659             | 1+       | <sup>1,5</sup> X <sub>3</sub>                   | 694.2665             | 0.86              |
| 720.2817             | 1+       | <sup>0,3</sup> X <sub>3</sub> /Z <sub>4</sub>   | 720.2821             | 0.56              |
| 750.2925             | 1+       | <sup>0,4</sup> X <sub>3</sub> /Z <sub>4</sub>   | 750.2927             | 0.27              |
| 768.3031             | 1+       | Z <sub>4</sub> <sup>•</sup> -CH <sub>3</sub> CO | 768.3033             | 0.26              |
| 780.3025             | 1+       | Z <sub>4</sub> <sup>•</sup> -CH <sub>2</sub> OH | 780.3033             | 1.03              |
| 794.292              | 1+       | <sup>0,2</sup> A <sub>5</sub>                   | 794.2925             | 0.63              |
| 810.314              | 1+       | Z <sub>4</sub>                                  | 810.3138             | -0.25             |
| 828.324              | 1+       | Y <sub>4</sub>                                  | 828.3244             | 0.48              |
| 851.3129             | 1+       | M-Tag                                           | 851.3145             | 1.88              |
| 856.3189             | 1+       | <sup>1,5</sup> X <sub>4</sub>                   | 856.3193             | 0.47              |
| 870.3346             | 1+       | <sup>0,2</sup> X <sub>4</sub>                   | 870.3349             | 0.34              |
| 926.3604             | 1+       | M-CH <sub>4</sub> O <sub>2</sub>                | 926.3613             | 0.97              |
| 943.3632             | 1+       | M-CH <sub>3</sub> O                             | 943.364              | 0.85              |
| 956.3712             | 1+       | M-H <sub>2</sub> O                              | 956.3718             | 0.63              |
| 974.3817             | 1+       | Precursor                                       | 974.3823             | 0.62              |



**Table S-10.** List of assigned EED (16 eV) fragments of the Me-PRAGS-labeled LNFP II.

| <i>m/z (obsv'd.)</i> | <i>z</i> | <i>Assignment</i>                                    | <i>m/z (calc'd.)</i> | <i>Δm/z (ppm)</i> |
|----------------------|----------|------------------------------------------------------|----------------------|-------------------|
| 253.1178             | 1+       | Z <sub>1</sub> <sup>•</sup> -CH <sub>2</sub> OH      | 253.1183             | 1.98              |
| 265.1178             | 1+       | Z <sub>1</sub> <sup>•</sup> -H <sub>2</sub> O        | 265.1183             | 1.89              |
| 283.1283             | 1+       | Z <sub>1</sub>                                       | 283.1288             | 1.77              |
| 301.1389             | 1+       | Y <sub>1</sub>                                       | 301.1394             | 1.66              |
| 324.7989             |          | ω <sub>3</sub>                                       |                      |                   |
| 329.1338             | 1+       | <sup>1,5</sup> X <sub>1</sub>                        | 329.1343             | 1.52              |
| 350.144              | 1+       | B <sub>2</sub> /Y <sub>3α</sub>                      | 350.1446             | 1.71              |
| 366.1389             | 1+       | B <sub>2</sub> /Y <sub>3β</sub>                      | 366.1395             | 1.64              |
| 406.6677             | 2+       | Y <sub>3α</sub> <sup>2+</sup>                        | 406.6686             | 2.21              |
| 414.6653             | 2+       | Y <sub>3β</sub> <sup>2+</sup>                        | 414.6661             | 1.93              |
| 429.1861             | 1+       | Z <sub>2</sub> <sup>•</sup> -OH                      | 429.1862             | 0.23              |
| 445.1811             | 1+       | Z <sub>2</sub>                                       | 445.1816             | 1.12              |
| 461.1761             | 1+       | Y <sub>2</sub> <sup>‡</sup>                          | 461.1766             | 1.08              |
| 463.1917             | 1+       | Y <sub>2</sub>                                       | 463.1922             | 1.08              |
| 491.1865             | 1+       | <sup>1,5</sup> X <sub>2</sub>                        | 491.1871             | 1.22              |
| 512.1967             | 1+       | B <sub>2</sub>                                       | 512.1974             | 1.37              |
| 530.2074             | 1+       | C <sub>2</sub>                                       | 530.2079             | 0.94              |
| 546.229              | 1+       | <sup>0,2</sup> X <sub>2</sub>                        | 546.2293             | 0.55              |
| 590.2551             | 1+       | Z <sub>3α</sub> /Z <sub>3β</sub> -CH <sub>2</sub> CO | 590.2556             | 0.85              |
| 632.2656             | 1+       | Z <sub>3α</sub> /Z <sub>3β</sub>                     | 632.2661             | 0.79              |
| 648.2604             | 1+       | Y <sub>3α</sub> /Z <sub>3β</sub>                     | 648.261              | 0.93              |
| 650.2762             | 1+       | Y <sub>3α</sub> /Z <sub>3β</sub> ''                  | 650.2766             | 0.62              |
| 678.271              | 1+       | Z <sub>3α</sub> / <sup>1,5</sup> X <sub>3β</sub>     | 678.2716             | 0.88              |
| 736.3131             | 1+       | <sup>0,4</sup> X <sub>2</sub> /Z <sub>3α</sub>       | 736.3137             | 0.81              |
| 753.3158             | 1+       | Z <sub>3α</sub> <sup>•</sup> -CH <sub>2</sub> CO     | 753.3162             | 0.53              |
| 768.3036             | 1+       | Z <sub>3β</sub> <sup>•</sup> -CH <sub>3</sub> CO     | 768.3033             | -0.39             |
| 780.3027             | 1+       | Z <sub>3β</sub> <sup>•</sup> -CH <sub>2</sub> OH     | 780.3033             | 0.77              |
| 794.318              | 1+       | Z <sub>3α</sub>                                      | 794.3189             | 1.13              |
| 810.3143             | 1+       | Z <sub>3β</sub>                                      | 810.3138             | -0.62             |
| 812.3289             | 1+       | Y <sub>3α</sub>                                      | 812.3295             | 0.74              |
| 828.324              | 1+       | Y <sub>3β</sub>                                      | 828.3244             | 0.48              |
| 840.324              | 1+       | <sup>1,5</sup> X <sub>3α</sub>                       | 840.3244             | 0.48              |
| 851.3131             | 1+       | M-Tag                                                | 851.3145             | 1.64              |
| 854.3398             | 1+       | <sup>0,2</sup> X <sub>3α</sub>                       | 854.34               | 0.23              |
| 856.3189             | 1+       | <sup>1,5</sup> X <sub>3β</sub>                       | 856.3193             | 0.47              |
| 870.3347             | 1+       | <sup>0,2</sup> X <sub>3β</sub>                       | 870.3349             | 0.23              |
| 943.3631             | 1+       | M-CH <sub>3</sub> O                                  | 943.364              | 0.95              |
| 956.3713             | 1+       | M-H <sub>2</sub> O                                   | 956.3718             | 0.52              |
| 974.3818             | 1+       | Precursor                                            | 974.3823             | 0.51              |

**Table S-11.** List of assigned EED (16 eV) fragments of the Me-PRAGS-labeled LNFP III.

| <i>m/z (obsv'd.)</i> | <i>z</i> | <i>Assignment</i>                                    | <i>m/z (calc'd.)</i> | <i>Δm/z (ppm)</i> |
|----------------------|----------|------------------------------------------------------|----------------------|-------------------|
| 253.1177             | 1+       | Z <sub>1</sub> <sup>•</sup> -CH <sub>2</sub> OH      | 253.1183             | 2.37              |
| 265.1177             | 1+       | Z <sub>1</sub> <sup>•</sup> -H <sub>2</sub> O        | 265.1183             | 2.26              |
| 283.1283             | 1+       | Z <sub>1</sub>                                       | 283.1288             | 1.77              |
| 301.1389             | 1+       | Y <sub>1</sub>                                       | 301.1394             | 1.66              |
| 324.7988             |          | ω <sub>3</sub>                                       |                      |                   |
| 329.1337             | 1+       | <sup>1,5</sup> X <sub>1</sub>                        | 329.1343             | 1.82              |
| 350.144              | 1+       | B <sub>2</sub> /Y <sub>3α</sub>                      | 350.1446             | 1.71              |
| 366.1389             | 1+       | B <sub>2</sub> /Y <sub>3β</sub>                      | 366.1395             | 1.64              |
| 414.6654             | 2+       | Y <sub>3β</sub> <sup>2+</sup>                        | 414.6661             | 1.69              |
| 429.1862             | 1+       | Z <sub>2</sub> <sup>•</sup> -OH                      | 429.1862             | 0.00              |
| 445.1812             | 1+       | Z <sub>2</sub>                                       | 445.1816             | 0.90              |
| 461.176              | 1+       | Y <sub>2</sub> <sup>†</sup>                          | 461.1766             | 1.30              |
| 463.1916             | 1+       | Y <sub>2</sub>                                       | 463.1922             | 1.30              |
| 491.1866             | 1+       | <sup>1,5</sup> X <sub>2</sub>                        | 491.1871             | 1.02              |
| 512.1969             | 1+       | B <sub>2</sub>                                       | 512.1974             | 0.98              |
| 530.2074             | 1+       | C <sub>2</sub>                                       | 530.2079             | 0.94              |
| 546.2287             | 1+       | <sup>0,2</sup> X <sub>2</sub>                        | 546.2293             | 1.10              |
| 590.2549             | 1+       | Z <sub>3α</sub> /Z <sub>3β</sub> -CH <sub>2</sub> CO | 590.2556             | 1.19              |
| 632.2657             | 1+       | Z <sub>3α</sub> /Z <sub>3β</sub>                     | 632.2661             | 0.63              |
| 648.2601             | 1+       | Y <sub>3α</sub> /Z <sub>3β</sub>                     | 648.261              | 1.39              |
| 650.2761             | 1+       | Y <sub>3α</sub> /Z <sub>3β</sub> ''                  | 650.2766             | 0.77              |
| 752.3078             | 1+       | Z <sub>3α</sub> <sup>•</sup> -CH <sub>3</sub> CO     | 752.3084             | 0.80              |
| 764.308              | 1+       | Z <sub>3α</sub> <sup>•</sup> -CH <sub>2</sub> OH     | 764.3084             | 0.52              |
| 780.3033             | 1+       | Z <sub>3β</sub> <sup>•</sup> -CH <sub>2</sub> OH     | 780.3033             | 0.00              |
| 794.3183             | 1+       | Z <sub>3α</sub>                                      | 794.3189             | 0.76              |
| 810.3142             | 1+       | Z <sub>3β</sub>                                      | 810.3138             | -0.49             |
| 812.3291             | 1+       | Y <sub>3α</sub>                                      | 812.3295             | 0.49              |
| 828.324              | 1+       | Y <sub>3β</sub>                                      | 828.3244             | 0.48              |
| 840.324              | 1+       | <sup>1,5</sup> X <sub>3α</sub>                       | 840.3244             | 0.48              |
| 856.319              | 1+       | <sup>1,5</sup> X <sub>3β</sub>                       | 856.3193             | 0.35              |
| 943.364              | 1+       | M-CH <sub>3</sub> O                                  | 943.364              | 0.00              |
| 956.3715             | 1+       | M-H <sub>2</sub> O                                   | 956.3718             | 0.31              |
| 974.3819             | 1+       | Precursor                                            | 974.3823             | 0.41              |

**Table S-12.** List of assigned EED (16 eV) fragments of the Me-PRAGS-labeled LNFP V.

| <i>m/z (obsv'd.)</i> | <i>z</i> | <i>Assignment</i>                                  | <i>m/z (calc'd.)</i> | <i>Δm/z (ppm)</i> |
|----------------------|----------|----------------------------------------------------|----------------------|-------------------|
| 267.1342             | 1+       | Z <sub>1α</sub> /Z <sub>1β</sub>                   | 267.1339             | -1.12             |
| 283.129              | 1+       | Y <sub>1α</sub> /Z <sub>1β</sub>                   | 283.1288             | -0.71             |
| 301.1395             | 1+       | Y <sub>1α</sub> /Y <sub>1β</sub>                   | 301.1394             | -0.33             |
| 324.7996             |          | ω <sub>3</sub>                                     |                      |                   |
| 329.1344             | 1+       | <sup>1,5</sup> X <sub>1α</sub> /Y <sub>1β</sub>    | 329.1343             | -0.30             |
| 366.1395             | 1+       | B <sub>2α</sub>                                    | 366.1395             | 0.00              |
| 399.1762             | 1+       | Z <sub>1α</sub> <sup>•</sup> -CH <sub>2</sub> OH   | 399.1762             | 0.00              |
| 406.6684             | 2+       | Y <sub>3α</sub> <sup>2+</sup>                      | 406.6686             | 0.49              |
| 429.1867             | 1+       | Z <sub>1α</sub>                                    | 429.1867             | 0.00              |
| 445.1817             | 1+       | Y <sub>1α</sub> <sup>‡</sup>                       | 445.1817             | 0.00              |
| 447.1973             | 1+       | Y <sub>1α</sub>                                    | 447.1973             | 0.00              |
| 463.1926             | 1+       | Y <sub>2α</sub> /Y <sub>1β</sub>                   | 463.1922             | -0.86             |
| 475.1922             | 1+       | <sup>1,5</sup> X <sub>1α</sub>                     | 475.1922             | 0.00              |
| 491.1871             | 1+       | <sup>1,5</sup> X <sub>2α</sub> /Y <sub>1β</sub>    | 491.1871             | 0.00              |
| 528.1923             | 1+       | B <sub>3α</sub>                                    | 528.1923             | 0.00              |
| 575.2446             | 1+       | Z <sub>2α</sub> <sup>•</sup> -OH                   | 575.2446             | 0.00              |
| 591.2394             | 1+       | Z <sub>2α</sub>                                    | 591.2395             | 0.17              |
| 607.2349             | 1+       | Y <sub>2α</sub> <sup>‡</sup>                       | 607.2345             | -0.66             |
| 609.2501             | 1+       | Y <sub>2α</sub>                                    | 609.2501             | 0.00              |
| 632.266              | 1+       | Z <sub>3α</sub> /Z <sub>1β</sub>                   | 632.2661             | 0.16              |
| 637.245              | 1+       | <sup>1,5</sup> X <sub>2α</sub>                     | 637.245              | 0.00              |
| 750.2932             | 1+       | <sup>0,4</sup> X <sub>0</sub> /Z <sub>1β</sub>     | 750.2927             | -0.67             |
| 753.3152             | 1+       | Z <sub>3α</sub> <sup>•</sup> -CH <sub>2</sub> CO   | 753.3162             | 1.33              |
| 778.3238             | 1+       | Z <sub>3α</sub> <sup>•</sup> -OH                   | 778.3235             | -0.39             |
| 794.3193             | 1+       | Z <sub>3α</sub> (Z <sub>1β</sub> <sup>•</sup> -OH) | 794.3189             | -0.50             |
| 810.3145             | 1+       | Z <sub>1β</sub>                                    | 810.3138             | -0.86             |
| 812.3292             | 1+       | Y <sub>3α</sub>                                    | 812.3295             | 0.37              |
| 828.3242             | 1+       | Y <sub>1β</sub>                                    | 828.3244             | 0.24              |
| 840.3243             | 1+       | <sup>1,5</sup> X <sub>3α</sub>                     | 840.3244             | 0.12              |
| 851.3138             | 1+       | M-Tag                                              | 851.3145             | 0.82              |
| 856.3191             | 1+       | <sup>1,5</sup> X <sub>1β</sub>                     | 856.3193             | 0.23              |
| 870.3354             | 1+       | <sup>0,2</sup> X <sub>1β</sub>                     | 870.3349             | -0.57             |
| 926.3611             | 1+       | M-CH <sub>4</sub> O <sub>2</sub>                   | 926.3613             | 0.22              |
| 943.3643             | 1+       | M-CH <sub>3</sub> O                                | 943.364              | -0.32             |
| 956.3715             | 1+       | M-H <sub>2</sub> O                                 | 956.3718             | 0.31              |
| 974.382              | 1+       | Precursor                                          | 974.3823             | 0.31              |

**Table S-13.** List of assigned EED (16 eV) fragments of the Me-PRAGS-labeled LNFP VI.

| <i>m/z (obsv'd.)</i> | <i>z</i> | <i>Assignment</i>                                  | <i>m/z (calc'd.)</i> | <i>Δm/z (ppm)</i> |
|----------------------|----------|----------------------------------------------------|----------------------|-------------------|
| 267.1339             | 1+       | Z <sub>1α</sub> /Z <sub>1β</sub>                   | 267.1339             | 0.00              |
| 283.1291             | 1+       | Y <sub>1α</sub> /Z <sub>1β</sub>                   | 283.1288             | -1.06             |
| 301.1397             | 1+       | Y <sub>1α</sub> /Y <sub>1β</sub>                   | 301.1394             | -1.00             |
| 324.7999             |          | ω <sub>3</sub>                                     |                      |                   |
| 329.1345             | 1+       | <sup>1,5</sup> X <sub>1α</sub> /Y <sub>1β</sub>    | 329.1343             | -0.61             |
| 366.1395             | 1+       | B <sub>2α</sub>                                    | 366.1395             | 0.00              |
| 399.1762             | 1+       | Z <sub>1α</sub> <sup>•</sup> -CH <sub>2</sub> OH   | 399.1762             | 0.00              |
| 406.6683             | 2+       | Y <sub>3α</sub> <sup>2+</sup>                      | 406.6686             | 0.74              |
| 420.6658             | 2+       | <sup>1,5</sup> X <sub>3α</sub> <sup>2+</sup>       | 420.6661             | 0.71              |
| 429.1867             | 1+       | Z <sub>1α</sub>                                    | 429.1867             | 0.00              |
| 445.1816             | 1+       | Y <sub>1α</sub> <sup>‡</sup>                       | 445.1817             | 0.22              |
| 447.1973             | 1+       | Y <sub>1α</sub>                                    | 447.1973             | 0.00              |
| 463.1922             | 1+       | Y <sub>2α</sub> /Y <sub>1β</sub>                   | 463.1922             | 0.00              |
| 475.1922             | 1+       | <sup>1,5</sup> X <sub>1α</sub>                     | 475.1922             | 0.00              |
| 491.187              | 1+       | <sup>1,5</sup> X <sub>2α</sub> /Y <sub>1β</sub>    | 491.1871             | 0.20              |
| 575.2445             | 1+       | Z <sub>2α</sub> <sup>•</sup> -OH                   | 575.2446             | 0.17              |
| 591.2399             | 1+       | Z <sub>2α</sub>                                    | 591.2395             | -0.68             |
| 607.2348             | 1+       | Y <sub>2α</sub> <sup>‡</sup>                       | 607.2345             | -0.49             |
| 609.2498             | 1+       | Y <sub>2α</sub>                                    | 609.2501             | 0.49              |
| 632.2657             | 1+       | Z <sub>3α</sub> /Z <sub>1β</sub>                   | 632.2661             | 0.63              |
| 637.2449             | 1+       | <sup>1,5</sup> X <sub>2α</sub>                     | 637.245              | 0.16              |
| 750.2929             | 1+       | <sup>0,4</sup> X <sub>0</sub> /Z <sub>1β</sub>     | 750.2927             | -0.27             |
| 752.3083             | 1+       | Z <sub>3α</sub> <sup>•</sup> -CH <sub>3</sub> CO   | 752.3084             | 0.13              |
| 764.3083             | 1+       | Z <sub>3α</sub> <sup>•</sup> -CH <sub>2</sub> OH   | 764.3084             | 0.13              |
| 778.3235             | 1+       | Z <sub>3α</sub> <sup>•</sup> -OH                   | 778.3235             | 0.00              |
| 794.3189             | 1+       | Z <sub>3α</sub> (Z <sub>1β</sub> <sup>•</sup> -OH) | 794.3189             | 0.00              |
| 810.3144             | 1+       | Z <sub>1β</sub>                                    | 810.3138             | -0.74             |
| 812.3295             | 1+       | Y <sub>3α</sub>                                    | 812.3295             | 0.00              |
| 828.3243             | 1+       | Y <sub>1β</sub>                                    | 828.3244             | 0.12              |
| 840.3243             | 1+       | <sup>1,5</sup> X <sub>3α</sub>                     | 840.3244             | 0.12              |
| 851.3137             | 1+       | M-Tag                                              | 851.3145             | 0.94              |
| 856.3192             | 1+       | <sup>1,5</sup> X <sub>1β</sub>                     | 856.3193             | 0.12              |
| 926.362              | 1+       | M-CH <sub>4</sub> O <sub>2</sub>                   | 926.3613             | -0.76             |
| 943.3633             | 1+       | M-CH <sub>3</sub> O                                | 943.364              | 0.74              |
| 956.3716             | 1+       | M-H <sub>2</sub> O                                 | 956.3718             | 0.21              |
| 974.3821             | 1+       | Precursor                                          | 974.3823             | 0.21              |
